# Supplementary material for: Ecological Restoration Practices within a Semi-arid Natural Gas Field Improve Insect Abundance and Diversity during Early and Late Growing Season
Source: MDPI journal article supplement (doi:10.3390/ani13010134), 2022-12-29
Supplement: s1 [file s1]

## Article

# Ecological Restoration Practices within a Semi-arid Natural Gas Field Improve Insect Abundance and Diversity during Early and Late Growing Season

Michael F. Curran, Joshua R. Sorenson, Zoe A. Craft, Taylor M. Crow, Timothy J. Robinson and Peter D. Stahl

**Table S1.** Species in Seed Mix 'B1' in Jonah Field.

*Achnatherum hymenoides*  
*Elymus elymoides* (Raf.) Swezey spp. *brevifolius*  
*Pseudoroegneria spicata* (Pursh) A. Love  
*Leymus cinereus* (Scribn. & Merr.) A. Love  
*Hesperostipa comata* (Trin. & Rupr.) Barkworth  
*Atriplex canescens* (Pursh) Nutt.  
*Sphaeralcea munroana* (Douglas) Spach  
*Oenothera pallida* Lindl.  
*Penstemon procerus* Douglas ex Graham  
*Cleome serrulata* Pursh  
*Penstemon palmeri*  
*Artemisia tridentata* spp. *Wyomingensis* Beetle & Young  
*Achillea millefolium* L. var. *occidentalis* DC.  
*Eriogonum umbellatum* Torr.  
*Artemisia tridentata* Nuttall  
*Symphyotrichum laeve* (L.) A. Love & D. Love var. *laeve*  
*Lupinus argenteus* Pursh  
*Linum lewisii* Pursh  
*Krascheninnikovia lanata* (Pursh) A. Meesuse & Smit  
*Poa secunda* Presl  
*Erigeron engelmannii* A. Nelson
