# Supplementary material for: Ecological Restoration Practices within a Semi-arid Natural Gas Field Improve Insect Abundance and Diversity during Early and Late Growing Season
Source: Animals (Basel). 2022 Dec 29;13(1):134. doi: 10.3390/ani13010134 (PMC9817726; doi:10.3390/ani13010134)
Supplement: Supplementary file 1 [file animals-13-00134-s001.zip › animals-1989946 -Table S2.xlsx]

## Sheet: Early_Season
Site	Description	Col_Date	Chrysomelidae	Curculionidae	Cerambycidae	Apionidae	Cantharidae	Carabidae	Cicindelidae	Meloidae	Coccinellidae	Anthcidae	Merylidae	Nitiddulidae	Tenebrionidae	Silphidae	Scarabidae	Noctudiae	Pyralidae	Others	Phoridae	Tephritidae	Asilidae	Bombyliidae	Nemestrinidae	Therevidae	Anthomyiidae	Calliphoridae	Sarcophagidae	Tachnidae	Others	Formicidae	Chalcididae	Sphecidae	Ichnumonidae	Braconidae	Halictidae	Collictidae	Vespidae	Mutilidae	Pompillidae	Scelionidae	Bombilidae	Cercopidae	Cicadellidae	Nabidae	Lygaedae	Cicadidae	Myridae
1	Reclaim 1		0	0	0	0	0	0	0	0	0	0	0	0	0	0	0	0	0	0	0	0	0	0	0	0	0	0	0	0	0	0	0	0	0	0	24	0	1	0	0	0	0	0	23	0	0	0	2
1	Reclaim 2		2	0	0	0	0	0	0	0	0	0	0	0	0	0	0	0	0	0	2	0	0	0	0	0	0	0	0	0	0	1	2	0	0	0	0	0	0	0	0	0	0	0	8	0	1	0	1
1	Reference 1		0	0	0	0	0	0	0	0	1	0	0	0	0	0	0	0	0	0	0	0	0	0	0	0	0	0	0	0	0	0	0	0	1	1	0	0	0	0	0	0	0	0	3	0	0	0	1
11	Reference 2		1	0	0	0	0	0	0	0	0	0	0	0	0	0	0	0	0	0	0	0	0	0	0	0	0	0	0	0	0	0	0	0	0	1	0	0	0	0	0	0	0	0	5	0	0	0	0
2	Reclaim 1		6	0	0	0	0	0	0	0	0	0	0	0	0	0	0	0	0	0	0	0	0	0	0	0	0	0	0	0	0	0	0	0	0	0	8	0	0	0	0	0	0	0	0	0	0	0	2
2	Reclaim 2		0	0	0	0	0	0	0	0	0	0	0	0	0	0	0	0	0	0	6	0	0	0	0	0	0	0	0	0	0	4	0	0	0	2	5	0	0	0	0	0	0	0	5	0	0	0	0
2	Reference 1		0	0	0	0	0	0	0	0	2	0	0	0	0	0	0	0	0	0	0	0	0	0	0	0	0	0	0	0	0	0	0	0	0	0	0	0	0	0	0	0	0	0	7	0	0	0	1
2	Reference 2		0	0	0	0	0	0	0	0	0	0	0	0	0	0	0	0	0	0	0	0	0	0	0	0	0	0	0	0	0	0	0	0	0	4	2	0	0	0	0	0	0	5	0	0	0	0	0
3	Reclaim 1		2	0	0	0	0	0	0	0	0	0	0	0	0	0	0	0	0	2	0	0	0	0	0	0	0	0	0	0	0	3	2	0	0	0	4	0	0	0	0	0	0	2	0	0	0	0	0
3	Reclaim 2		3	0	0	0	0	0	0	0	0	0	0	0	0	0	0	0	0	0	0	0	0	0	0	0	0	0	0	0	0	0	0	0	0	0	2	0	0	0	0	0	0	0	3	0	0	0	3
3	Reference 1		0	0	0	0	0	0	0	0	0	0	0	0	0	0	0	0	0	0	0	0	0	0	0	0	0	0	0	0	0	0	2	0	0	2	0	0	0	0	0	0	0	0	4	0	0	0	2
3	Reference 2		0	1	0	0	0	0	0	0	0	0	0	0	0	0	0	0	0	0	0	0	0	0	0	0	0	0	0	0	1	0	0	0	0	4	0	0	0	0	0	0	0	0	4	0	0	0	0
4	Reclaim 1		0	0	0	0	0	0	0	0	1	0	0	0	0	0	0	0	0	0	0	0	0	0	0	0	0	0	0	0	0	24	1	0	0	2	0	0	0	0	0	0	0	0	0	0	0	0	0
4	Reclaim 2		0	0	0	0	0	0	0	0	0	0	0	0	0	0	0	0	0	0	3	0	0	0	0	0	0	0	0	0	0	0	0	0	0	0	0	0	0	0	0	0	0	3	4	0	0	0	2
4	Reference 1		0	0	0	0	0	0	0	0	0	0	0	0	0	0	0	0	0	0	0	2	0	0	0	0	0	0	0	0	0	0	0	0	0	5	0	0	0	0	0	0	0	0	4	0	0	0	0
4	Reference 2		0	0	0	0	0	0	0	0	0	0	0	0	0	0	0	0	0	0	0	1	0	0	0	0	0	0	0	0	0	0	0	0	0	2	0	0	0	0	0	0	0	3	0	0	0	0	0
5	Reclaim 1		0	0	0	0	0	0	0	0	0	0	0	0	0	0	0	0	0	0	0	0	0	0	0	0	0	0	0	0	0	0	4	0	0	2	2	0	0	0	0	0	0	7	0	0	0	0	2
5	Reclaim 2		2	0	0	0	0	0	0	0	0	0	0	0	0	0	0	0	0	0	2	0	0	0	0	0	0	0	0	0	0	0	0	0	0	0	4	0	0	0	0	0	0	0	5	0	0	0	5
5	Reference 1		0	0	0	0	0	0	0	0	0	0	0	0	0	0	0	0	0	0	1	0	0	0	0	0	0	0	0	0	0	0	2	0	0	0	0	0	0	0	0	0	0	0	0	0	0	0	0
5	Reference 2		0	0	0	0	0	0	0	0	0	0	0	0	0	0	0	0	0	0	0	0	0	0	0	0	0	0	0	0	0	0	0	0	0	2	0	0	0	0	0	0	0	0	0	0	0	0	0
6	Reclaim 1		0	0	0	0	0	0	0	0	0	0	0	0	0	0	0	0	0	0	2	0	0	0	0	0	0	0	1	0	0	2	0	0	0	0	0	0	0	0	0	0	0	0	0	0	0	0	4
6	Reclaim 2		0	0	0	0	0	0	0	0	0	0	0	0	0	0	0	0	0	0	2	0	0	0	0	0	0	0	2	0	1	4	0	0	0	2	0	0	0	0	0	0	0	0	5	0	0	0	0
6	Reference 1		0	0	0	0	0	0	0	0	0	0	0	0	0	0	0	0	0	0	0	0	0	0	0	0	0	0	0	0	0	0	0	0	0	0	1	0	0	0	0	0	0	0	0	1	0	0	1
6	Reference 2		0	0	0	0	0	0	0	0	0	0	0	0	0	0	0	0	0	0	0	0	0	0	0	0	0	0	0	0	0	0	0	0	0	1	0	0	0	0	0	0	0	0	0	0	0	0	0
[truncated: 3 more columns]

## Sheet: Late_Season
Site	Description	Col_Date	Chrysomelidae	Curculionidae	Cerambycidae	Apionidae	Cantharidae	Carabidae	Cicindelidae	Meloidae	Coccinellidae	Anthcidae	Merylidae	Nitiddulidae	Tenebrionidae	Silphidae	Scarabidae	Noctudiae	Pyralidae	Others	Phoridae	Tephritidae	Asilidae	Bombyliidae	Nemestrinidae	Therevidae	Anthomyiidae	Calliphoridae	Sarcophagidae	Tachnidae	Others	Formicidae	Chalcididae	Sphecidae	Ichnumonidae	Braconidae	Halictidae	Collictidae	Vespidae	Mutilidae	Pompillidae	Scelionidae	Bombilidae	Cercopidae	Cicadellidae	Nabidae	Lygaedae	Cicadidae	Gryllacrididae
1	Reclaim 1		31	0	0	0	0	0	0	0	0	0	0	0	0	0	0	0	0	0	0	0	0	0	0	0	0	0	0	0	2	0	0	0	0	1	0	0	0	0	0	0	24	0	0	0	10	0	0
1	Reclaim 2		42	0	0	0	0	0	0	0	0	0	0	0	0	0	0	0	0	0	0	0	0	0	0	0	0	0	0	0	12	3	0	0	0	0	2	0	0	0	0	0	5	1	0	0	18	0	0
1	Reference 1		2	0	0	0	0	0	0	0	0	0	0	0	0	0	0	0	0	0	0	0	0	0	0	0	0	0	0	0	4	0	0	0	0	0	0	0	0	0	0	1	0	0	0	0	0	0	0
1	Reference 2		0	0	0	0	0	0	0	0	0	0	0	0	0	0	0	0	0	0	0	0	0	0	0	0	0	0	0	0	0	0	0	0	0	1	0	0	0	0	0	1	0	2	0	0	0	0	0
2	Reclaim 1		126	0	0	0	0	0	0	0	1	0	0	0	0	0	0	0	0	1	0	0	0	0	0	0	0	0	0	0	5	2	0	0	0	0	2	0	0	0	1	0	0	3	0	0	5	0	0
2	Reclaim 2		55	0	0	0	0	0	0	0	0	0	0	0	0	0	0	0	1	0	0	0	0	0	0	0	0	0	0	0	0	0	0	0	0	0	4	0	0	0	0	0	1	4	0	0	4	0	0
2	Reference 1		0	0	0	0	0	0	0	0	0	0	0	0	0	0	0	0	0	0	0	0	0	0	0	0	0	0	0	0	2	0	0	0	0	0	0	0	0	0	0	0	0	0	0	0	0	0	0
2	Reference 2		0	0	0	0	0	0	0	0	0	0	0	0	0	0	0	0	0	0	0	0	0	0	0	0	0	0	0	0	0	0	0	0	0	0	0	0	0	0	0	0	0	1	0	0	0	0	0
3	Reclaim 1		51	0	0	0	0	0	0	0	0	0	0	0	0	0	0	0	0	0	0	0	0	0	0	0	0	0	0	0	15	0	1	0	0	2	4	0	0	0	0	0	11	2	0	0	17	0	0
3	Reclaim 2		46	0	0	0	0	0	0	0	0	0	0	0	0	0	0	0	0	0	0	0	0	0	0	0	0	1	1	0	9	1	0	1	0	0	4	0	0	0	0	0	6	2	0	0	11	0	0
3	Reference 1		0	0	0	0	0	0	0	0	0	0	0	0	0	0	0	0	0	0	0	0	0	0	0	0	0	0	0	0	1	0	0	0	0	1	0	0	0	0	0	0	0	0	0	0	1	0	0
3	Reference 2		0	0	0	0	0	0	0	0	0	0	0	0	0	0	0	0	0	0	0	0	0	0	0	0	0	0	1	0	2	0	0	0	0	1	0	0	0	0	0	0	0	0	0	0	0	0	0
4	Reclaim 1		33	0	0	0	0	0	0	0	0	0	0	0	0	0	0	0	0	0	0	0	0	0	0	0	0	0	2	0	0	1	0	0	0	4	0	0	0	0	0	0	2	0	0	0	3	0	0
4	Reclaim 2		37	0	0	0	0	0	0	0	0	0	0	0	0	0	0	0	0	2	0	0	0	0	0	0	0	0	0	0	9	2	0	0	0	0	0	0	0	0	0	0	2	0	0	0	11	0	0
4	Reference 1		0	0	0	0	0	0	0	0	0	0	0	0	0	0	0	0	0	0	0	0	0	0	0	0	0	1	0	0	0	0	0	0	0	3	0	0	0	0	0	0	0	0	0	0	0	0	0
4	Reference 2		0	0	0	0	0	0	0	0	0	0	0	0	0	0	0	0	0	0	0	0	0	0	0	0	0	0	2	0	2	0	0	0	0	0	0	0	0	0	0	0	0	1	0	0	0	0	0
5	Reclaim 1		7	0	0	0	0	0	0	0	0	0	0	0	0	0	0	0	0	0	0	0	0	0	0	0	0	0	0	0	1	0	0	0	0	0	0	0	0	0	0	0	2	0	0	0	0	0	0
5	Reclaim 2		19	0	0	0	0	0	0	0	1	0	0	0	0	0	0	0	0	0	0	0	0	0	0	0	0	0	2	0	0	5	0	0	0	0	0	0	0	0	0	3	1	0	0	0	2	0	0
5	Reference 1		1	0	0	0	0	0	0	0	0	0	0	0	0	0	0	0	0	0	0	0	0	0	0	0	0	0	0	0	0	0	0	0	0	1	0	0	0	0	0	0	0	0	0	0	0	0	0
5	Reference 2		0	0	0	0	0	0	0	0	0	0	0	0	0	0	0	0	0	1	0	0	0	0	0	0	0	0	0	0	0	0	1	0	0	0	0	0	0	0	0	0	0	0	0	0	0	0	0
6	Reclaim 1		44	0	0	0	0	0	0	0	0	0	0	0	0	0	0	0	0	0	0	0	0	0	0	0	0	0	2	0	7	4	0	0	0	3	3	0	0	0	0	0	3	2	0	0	8	0	0
6	Reclaim 2		49	0	0	0	0	0	0	0	0	0	0	0	0	0	0	0	0	0	0	0	0	0	0	0	0	0	0	0	1	0	0	0	0	0	1	0	0	0	0	0	17	1	0	0	10	0	0
6	Reference 1		0	0	0	0	0	0	0	0	0	0	0	0	0	0	0	0	0	0	0	0	0	0	0	0	0	0	0	0	0	0	0	0	0	1	0	0	0	0	0	0	0	0	0	0	1	0	0
6	Reference 2		0	0	0	0	0	0	0	0	0	0	0	0	0	0	0	0	0	0	0	0	0	0	0	0	0	0	0	0	1	0	0	0	0	1	0	0	0	0	0	0	0	0	0	0	0	0	0
[truncated: 1 more columns]

## Sheet: Abundance_Total
Totals	Abundance
Early-Reclaim	237
Early-Reference	83
Late_Reclaim	858
Late-Reference	38

## Sheet: Abundance
Season	Type	Site	Abundance
Late	Reclaimed	1	152
Late	Reference	1	11
Late	Reclaimed	2	215
Late	Reference	2	3
Late	Reclaimed	3	185
Late	Reference	3	7
Late	Reclaimed	4	108
Late	Reference	4	9
Late	Reclaimed	5	43
Late	Reference	5	4
Late	Reclaimed	6	155
Late	Reference	6	4
Early	Reclaimed	7	67
Early	Reference	7	14
Early	Reclaimed	8	39
Early	Reference	8	22
Early	Reclaimed	9	30
Early	Reference	9	20
Early	Reclaimed	10	40
Early	Reference	10	17
Early	Reclaimed	11	35
Early	Reference	11	6
Early	Reclaimed	12	26
Early	Reference	12	4

## Sheet: Richness
Season	Type	Site	Richness
Late	Reclaimed	1	9
Late	Reference	1	5
Late	Reclaimed	2	11
Late	Reference	2	2
Late	Reclaimed	3	12
Late	Reference	3	4
Late	Reclaimed	4	8
Late	Reference	4	5
Late	Reclaimed	5	8
Late	Reference	5	4
Late	Reclaimed	6	9
Late	Reference	6	3
Early	Reclaimed	7	9
Early	Reference	7	6
Early	Reclaimed	8	8
Early	Reference	8	7
Early	Reclaimed	9	9
Early	Reference	9	6
Early	Reclaimed	10	8
Early	Reference	10	4
Early	Reclaimed	11	8
Early	Reference	11	4
Early	Reclaimed	12	8
Early	Reference	12	4
